1 **A realistic touch-transfer method reveals low risk of transmission for**  
2 **SARS-CoV-2 by contaminated coins and bank notes**

3  
4 Daniel Todt<sup>1,2</sup>, Toni Luise Meister<sup>1</sup>, Barbora Tamele<sup>3</sup>, John Howes<sup>3</sup>, Dajana Paulmann<sup>4</sup>,  
5 Britta Becker<sup>4</sup>, Florian H. Brill<sup>4</sup>, Mark Wind<sup>5</sup>, Jack Schijven<sup>6,7</sup>, Baxolele Mhleke<sup>8,9</sup>,  
6 Christine Goffinet<sup>8,9</sup>, Adalbert Krawczyk<sup>10,11</sup>, Jörg Steinmann<sup>12,13</sup>, Stephanie Pfaender<sup>1</sup>,  
7 Yannick Brüggemann<sup>1</sup>, Eike Steinmann<sup>1\*</sup>

8  
9 <sup>1</sup>Department of Molecular & Medical Virology, Ruhr University Bochum, 44801  
10 Bochum, Germany

11 <sup>2</sup>European Virus Bioinformatics Center (EVBC), 07743 Jena, Germany

12 <sup>3</sup>European Central Bank (ECB), 60314 Frankfurt am Main, Germany

13 <sup>4</sup>Dr. Brill + Partner GmbH Institute for Hygiene and Microbiology, Bremen, Germany

14 <sup>5</sup>Cash Policy Department, De Nederlandsche Bank, Amsterdam, The Netherlands

15 <sup>6</sup>Department of Statistics, Informatics and Modelling, National Institute of Public Health  
16 and the Environment, Bilthoven, the Netherlands

17 <sup>7</sup>Department of Earth Sciences, Utrecht University, Utrecht, the Netherlands

18 <sup>8</sup>Institute of Virology, Charité - Universitätsmedizin Berlin, corporate member of Freie  
19 Universität Berlin, Humboldt-Universität zu Berlin, Berlin, Germany

20 <sup>9</sup>Berlin Institute of Health (BIH), Berlin, Germany

21 <sup>10</sup>Institute for Virology, University Hospital Essen, University of Duisburg-Essen,  
22 Essen, Germany

23 <sup>11</sup>Department of Infectious Diseases, West German Centre of Infectious Diseases,  
24 Universitätsmedizin Essen, University Duisburg-Essen, Germany

25 <sup>12</sup>Institute of Clinical Hygiene, Medical Microbiology and Infectiology, General  
26 Hospital Nürnberg, Paracelsus Medical University, Nuremberg, Germany

27 <sup>13</sup>Institute of Medical Microbiology, University Hospital of Essen, Essen, Germany

28

29 **Running title:** Survival of coronaviruses on cash

30 Word count, abstract: 157

31 Word count, text: 3377

32

33 **\*Corresponding author:**

34 Prof. Dr. Eike Steinmann

35 Department of Molecular and Medical Virology

36 Ruhr University Bochum

37 Universitätsstr. 150

38 44801 Bochum, Germany

39 Phone: +49 234 32 23189, Fax: +49 234 32 14352

40 Email: [eike.steinmann@rub.de](mailto:eike.steinmann@rub.de)

41

42

43 **Abstract**

44 The current severe acute respiratory syndrome coronavirus 2 (SARS-CoV-2) pandemic  
45 has created a significant threat to global health. While respiratory aerosols or droplets  
46 are considered as the main route of human-to-human transmission, secretions expelled  
47 by infected individuals can also contaminate surfaces and objects, potentially creating  
48 the risk of fomite-based transmission. Consequently, frequently touched objects such as  
49 paper currency and coins have been suspected as a potential transmission vehicle. To  
50 assess the risk of SARS-CoV-2 transmission by banknotes and coins, we examined the  
51 stability of SARS-CoV-2 and bovine coronavirus (BCoV), as surrogate with lower  
52 biosafety restrictions, on these different means of payment and developed a touch  
53 transfer method to examine transfer efficiency from contaminated surfaces to skin.  
54 Although we observed prolonged virus stability, our results, including a novel touch  
55 transfer method, indicate that the transmission of SARS-CoV-2 via contaminated coins  
56 and banknotes is unlikely and requires high viral loads and a timely order of specific  
57 events.

58

59 **Key words:** SARS-CoV-2, stability, coins, banknotes, human skin

60

## 61 **1. Introduction**

62 The current severe acute respiratory syndrome coronavirus 2 (SARS-CoV-2) pandemic  
63 has created a significant threat to global health. Since effective treatments and access to  
64 vaccines is still limited for the broad population in most countries, diligent attention on  
65 transmission-based precautions is essential to limit viral spread. In particular considering  
66 the emergence of novel SARS-CoV-2 variants with possibly greater risk of transmission  
67 [1,2]. According to current evidence, SARS-CoV-2 is mainly transmitted through  
68 respiratory droplets and aerosols exhaled from infected individuals [3]. Respiratory  
69 secretions or droplets expelled by infected individuals can potentially contaminate  
70 surfaces and objects (fomites) and have been shown to persist on inanimate surfaces for  
71 days under controlled laboratory conditions [4,5]. Therefore, a clinically significant risk  
72 of SARS-CoV-2 transmission by fomites has been assumed [6–8]. The COVID-19  
73 pandemic intensified the decline in the transactional use of cash, partly due to reduced  
74 consumer spending, but also due to concerns about the risk of banknotes transmitting the  
75 virus. This was observed for either sides, the retailers' as well as the customers [9].  
76 Indeed, frequently touched objects such as banknotes and coins have been suspected to  
77 serve as transmission vehicle of various pathogenic bacteria, parasites, fungi and viruses  
78 including SARS-CoV-2 [10,11]. However, the conditions presented in various  
79 experimental studies frequently do not resemble real-life scenarios (e.g. large virus  
80 inoculums, small surface area) and thereby potentially exaggerating the risk of  
81 transmission of SARS-CoV-2 by fomites [12,13]. Although different viruses are readily  
82 exchanged between skin and surfaces, the fraction of virus transferred is dependent on  
83 multiple factors including virus species and surface material [14]. The efficiency of  
84 pathogen transfer from the fomite to hands is an important parameter to model its

85 potential for transmission and to implement effective hygiene measures, while avoiding  
86 unnecessary measures [15]. However, the transfer of SARS-CoV-2 from surfaces to skin  
87 has not been analyzed systematically. Here, we examined the stability of SARS-CoV-2  
88 and bovine coronavirus (BCoV) as surrogate on different means of payment. We further  
89 implemented a new protocol to study the touch transfer efficiency between fomites and  
90 skin. Importantly, we only observed a transfer between fomites and skin using a large  
91 initial virus titer sample ( $10^6$  infectious virus particles) on the tested surfaces, while  
92 lower initial virus titer stocks ( $10^4$  infectious virus particles) were not effectively  
93 transferred.

94 Overall, our results point to a low risk of SARS-CoV-2 transmission by coins and  
95 banknotes and the tendency to prefer contactless payment over cash during the pandemic  
96 seems unnecessary.

97

98 **Materials and methods**

99

100 *Preparation of test virus suspension*

101 For preparation of SARS-CoV-2 test virus suspension, Vero E6 cells were seeded in a  
102 75 cm<sup>2</sup> flasks at 2×10<sup>6</sup> cells in Dulbecco's Modified Eagle's Medium (DMEM,  
103 supplemented with 10 % (v/v) fetal calf serum (FCS), 1 % non-essential amino acids,  
104 100 IU/mL penicillin, 100 µg/mL streptomycin and 2 mM L-Glutamine). The monolayer  
105 was inoculated with the hCoV-19/Germany/BY-Bochum-1/2020 (GISAID accession  
106 ID: EPI\_ISL\_1118929). After 3 days and upon visible cytopathic effect the supernatant  
107 was harvested by centrifugation at 1500 rpm for 5 min at room temperature, aliquoted  
108 and stored at -80 °C until further usage.

109 For preparation of BCoV virus suspension, U373 cells were cultivated in a 75 cm<sup>2</sup> flask  
110 with in Minimum Essential Medium Eagle (EMEM) supplemented with L-glutamine,  
111 non-essential amino acids and sodium pyruvate and 10 % FCS. Before virus infection,  
112 cells were washed two times with phosphate buffered saline (PBS), incubated for 3 h  
113 with serum-free EMEM and were washed once with EMEM supplemented with trypsin.

114 For virus production, BCoV strain L9 (NCBI: txid11130) was added to the prepared  
115 monolayer. After an incubation period of 24 to 48 hours cells were lysed by a rapid  
116 freeze/thaw cycle followed by a low speed centrifugation in order to sediment cell debris.

117 After aliquoting of the supernatant, test virus suspension was stored at -80 °C. Nine  
118 volumes of test virus suspension were mixed with one volume of interfering substance  
119 solution [0.3 g/L bovine serum albumin (BSA) in PBS according to EN 16777, section  
120 5.2.2.8]. The tests were performed with two different virus concentrations, i.e. a titer of

121 approximately  $10^4$  50% tissue culture infectious dose per milliliter (TCID<sub>50</sub>/mL) and a  
122 titer of  $10^6$  TCID<sub>50</sub>/mL.

123

#### 124 *Preparation of specimens*

125 Prior to use regular 5-, 10-cent and 1-euro coins were dipped in a bath containing 70 %  
126 (v/v) ethanol for 5 min. The 10- and 50-euro banknotes (provided by the European  
127 Central Bank) and PVC plates [with PUR (polyurethane) surface coating 20 x 50 cm  
128 (VAH e.V.), precleaned with 70.0 % propan-1-ol or ethanol] were cut into pieces of 2 x  
129 2 cm. Banknotes were UV irradiated before the tests. Stainless steel discs (2 cm diameter  
130 discs) with Grade 2 B finish on both sides (article no. 4174-3000, GK Formblech GmbH,  
131 Berlin, Germany) served as reference control. Prior to use the discs were decontaminated  
132 with 5 % (v/v) Decon 90 for 60 minutes and 70 % (v/v) propan-2-ol for 15 min.  
133 Subsequently, the discs were rinsed with distilled water sterilized by autoclaving (steam  
134 sterilization).

135

#### 136 *Inactivation assays and controls*

137 For stability testing, specimens were placed aseptically in a Petri dish and inoculated  
138 with 50 µL of the virus inoculum [ $5 \times 10$  µL drops, i.e. four in every corner and one in  
139 the middle of the square (Fig. 3)]. After visible drying of the inoculum, the petri dishes  
140 were closed and the specimens were incubated until the end of the appropriate exposure  
141 time (up to 7 days). After the respective time, the specimens were transferred to 2 mL  
142 cell culture medium (without FCS) in a 25 mL container and vortexed for 60 seconds to  
143 resuspend the virus. Directly after elution, series of ten-fold dilutions of the eluate in ice-  
144 cold maintenance medium were prepared and inoculated on cell culture.

145 Fifteen and 30 minutes, 1, 2, 7, and 24 hours and 2, 3, 5 and 7 days were chosen as  
146 application times. Eluates were retained after appropriate drying times and residual  
147 infectivity was determined.

148 The initial virus titer (VIC) was determined by addition of 50  $\mu$ L of the virus inoculum  
149 directly to 2 mL cell culture medium without any desiccation.

150

#### 151 *Touch transfer test*

152 For the touch transfer test with BCoV, three test persons simulated the transfer by  
153 pressing a finger shortly on the dried inoculum on the respective carriers followed by  
154 rubbing once with pressure over the carrier. Three other test persons simulated the  
155 transfer by a fingerprint of 5 seconds on the dried inoculum on the different carriers.  
156 Each test person performed the transfer test separately with the two different virus  
157 concentrations ( $10^4$  TCID<sub>50</sub>/mL and  $10^6$  TCID<sub>50</sub>/mL) with 8 fingers each. For each test  
158 person and virus concentration, two fingers were used for virus transfer without drying  
159 of the inoculum. The transfer procedure was the same as with the dried inoculum.

160 The amount of transferred virus to the fingers was obtained by dipping and rubbing each  
161 finger in turn for one minute on the base of a Petri dish containing 2 mL cell culture  
162 medium without FCS as sample fluid. For each finger a separate dish was used. The  
163 eluates were transferred in a 25 mL container. Directly after elution, series of ten-fold  
164 dilutions of the eluate in ice-cold maintenance medium were prepared and inoculated on  
165 cell culture. The initial virus titer (VIC) was determined by addition of 50  $\mu$ L of the virus  
166 inoculum directly to 2 mL cell culture medium without any drying. Furthermore, a cell  
167 control (only addition of medium) was incorporated.



168 For the touch transfer test of SARS-CoV-2, one person performed all assays due to BSL3  
169 restrictions. To mimic the texture and nature of human fingertips, we used VITRO-SKIN  
170 (IMS Florida Skincare Testing, FL, USA), an artificial skin substitute, placed in a plastic  
171 frame was used (Fig. 3). After printing or rubbing as described above, the complete  
172 artificial skin was released from the frame and transferred into a 25 mL container with  
173 serum-free cell culture medium and vortexed for 60 s.

174

#### 175 *Determination of infectivity*

176 Infectivity was determined by means of end point dilution titration using the microtiter  
177 process. For this, samples were immediately diluted at the end of the exposure time with  
178 ice-cold EMEM containing trypsin and 100  $\mu$ L of each dilution were placed in 6 or 8  
179 wells of a sterile polystyrene flat-bottomed plate with a preformed U373 (BCoV) or Vero  
180 6 (SARS-CoV-2) monolayer. Before addition of virus, cells were washed twice with  
181 EMEM (U373) or DMEM (Vero 6) and incubated for 3 h with 100  $\mu$ L EMEM (U373)  
182 or DMEM (Vero 6) with trypsin. After 3 d or 6 d incubation at 37 °C in a CO<sub>2</sub>-  
183 atmosphere (5.0 % CO<sub>2</sub>-content), cultures were observed for cytopathic effects.  
184 TCID<sub>50</sub>/mL was calculated according to the method of Spearman and Kärber [16].

185

#### 186 *Fitting of virus titer decay*

187 To model the decay in virus titer, we implemented a Weibull distribution fit in GraphPad  
188 Prism version 9.0.2 for Windows (GraphPad Software, San Diego, California USA,  
189 [www.graphpad.com](http://www.graphpad.com))

190

191

192 *Calculation of the reduction factor*

193 The loss in virus titer by desiccation was calculated by subtracting the titer on the  
194 different carriers after desiccation from the titer of the initial virus control. The amount  
195 of transferred virus (TCID<sub>50</sub>/mL) from the different carriers to the fingers was also  
196 calculated with the method of Spearman and Kärber [16].

197

198

199 **Results**

200

201 **Stability of BCoV on euro banknotes**

202 To examine the stability of coronaviruses on banknotes we first used bovine coronavirus  
203 (BCoV), which can be cultivated under lower biosafety levels and has been used as a  
204 surrogate virus for inactivation studies replacing the highly pathogenic MERS-CoV and  
205 SARS-CoV [17]. All euro banknotes are made of pure cotton fiber. To protect the surface  
206 of banknotes with smaller denomination and prolong circulation life, 5 € and 10 €  
207 banknotes are coated with a varnish applied after printing [18]. To account for the effect  
208 of this varnish on surface stability of BCoV over time, we assessed residual infectivity  
209 from pieces of 10 € and 50 € banknotes for 7 h, 24 h and subsequently every 24 – 48 h  
210 up to 7 days (Fig. 1A). The initial virus concentration of  $4.3 \times 10^6$  TCID<sub>50</sub>/mL declined  
211 to  $1.84 \times 10^4$  TCID<sub>50</sub>/mL on 10 € banknotes and  $9.25 \times 10^4$  TCID<sub>50</sub>/mL on 50 €  
212 banknotes after 7 h desiccation. To quantitatively compare this early loss of titer on the  
213 different surfaces, we employed a fitted Weibull distribution model to estimate initial  
214 decay rates and the modelled time to lower limit of quantification (Fig. 1B, Table 1). For  
215 both banknotes we observed shorter initial decay (2.75 h on 50€ and 6.45 h on 10€) as  
216 compared to the steel disc (49.62 h) (Fig. 1B, Table 1). Following the strong initial decay,  
217 we were able to detect low amounts of infectious virus after 120 h (50€) and 168 h (10€)  
218 respectively (Fig. 1A), which is very much in line with the observed times in the model  
219 of 175.62 h for 50€. and 216.31 h for 10€ notes (Fig. 1B and Table 1). In contrast, on  
220 steel discs a more continuous decay was observed and infectious virus could be  
221 recovered up to 120 h (Fig. 1A), and 229.73 h for the fitted model, respectively (Fig. 1B,  
222 Table 1).

## 223 **Stability of SARS-CoV-2 on euro banknotes and coins**

224 We next examined the surface stability of infectious SARS-CoV-2 on 10 € banknotes,  
225 different coins (1 €, 10 cents, 5 cent) and stainless-steel discs for up to 7 days using an  
226 initial virus concentration of  $1.36 - 2.0 \times 10^6$  TCID<sub>50</sub>/mL (Fig. 2). On 10 € banknotes  
227 and 1 € coins, the initial virus concentration declined to  $2.32 \times 10^4$  TCID<sub>50</sub>/mL and  $1.79$   
228  $\times 10^4$  TCID<sub>50</sub>/mL, respectively, after 1.25 h, corresponding to an estimated initial decay  
229 time of 6.07 h and 2.21 h (Fig. 2B, Table 1). No infectious virus could be recovered after  
230 72 h and 48 h (Fig. 2A) matching 85.67 h and 28.43 h survival time (Fig. 2B, Table 1).  
231 In contrast, on 10 cent and 5 cent coins the initial virus concentration declined to  $5.96$   
232  $\times 10^4$  TCID<sub>50</sub>/mL and  $3.86 \times 10^1$  TCID<sub>50</sub>/mL, respectively, within 30 min. Initial decay  
233 rates were calculated as 49.8 min (10 cent) and 12 min (5 cent) (Fig. 2B, Table 1).  
234 Importantly, from 10 cent coins no infectious virus could be recovered after 6 h, while  
235 for 5 cent coins infectivity was completely lost after 1 h (Fig. 2A), as reflected by 2.28  
236 h and 33 min survival time for SARS-CoV-2 on 10 cent and 5 cent coins (Fig. 2B, Table  
237 1). In contrast, on stainless-steel discs, which served as reference material, initial decay  
238 and time to reach background levels were comparable to BCoV with 20.59 h and 158.83  
239 h, respectively (Fig. 2B, Table 1). Virus titers declined more evenly until no infectious  
240 virus could be recovered after 120 h (Fig. 2A).

241

## 242 **Development of a touch transfer assay to study virus transfer between cash and** 243 **finger pads**

244 Experiments performed under controlled laboratory conditions demonstrated the  
245 persistence of SARS-CoV-2 on inanimate surfaces for days and consequently implied  
246 the risk of viral transmission via contaminated objects [5,19]. However, to develop more

247 refined models to assess the risk of fomites-based transmission of SARS-CoV-2,  
248 quantitative measurements of the transfer efficiency of infectious virus between skin and  
249 surfaces are required. To address these limitations, we developed a touch transfer assay  
250 to study the transfer of infectious BCoV and SARS-CoV-2 between finger pads and  
251 different fomites (Fig. 3). Briefly, virus suspensions were placed on different surfaces  
252 (pieces of 10 € banknotes, 10 cent coins, pieces of PVC to mimic the surface of credit  
253 cards and stainless-steel discs as reference material). Afterwards, the wet inoculum or  
254 the dried suspension was touched by “printing” or “rubbing” using finger pads (BCoV)  
255 or an artificial skin fabric (SARS-CoV-2) (Fig. 3). Subsequently, infectious viruses were  
256 recovered by dipping and rubbing each fingertip in turn for one minute on the base of a  
257 Petri dish containing 2 mL of EMEM cell culture medium (BCoV) or, in case of the  
258 artificial skin, by directly placing it into a container with cold DMEM (SARS-CoV-2).  
259 The resulting suspension was serially diluted to determine TCID<sub>50</sub>/mL values of the  
260 remaining infectious virus.

261

### 262 **Transferability of BCoV from banknotes, coins and PVC to fingertips**

263 Using this newly developed touch transfer assay, we examined the transmission of BCoV  
264 from different surfaces, i.e. pieces of 10 € banknotes, 10 cent coins, pieces of PVC and  
265 stainless-steel discs as reference material, to fingertips. Surfaces were inoculated with  
266 either a high ( $\sim 1 \times 10^6$  TCID<sub>50</sub>/mL) or low ( $\sim 1 \times 10^4$  TCID<sub>50</sub>/mL) viral titer to represent  
267 different degrees of surface contamination. Virus transfer was assessed directly  
268 following application to fomites (wet) or after  $\sim 1$  h until completely dried (dry) by either  
269 pressing (print) or rubbing (rub) the fingertip onto the surface. Initial virus (input) was  
270 determined by applying the fomites directly to the medium container. For a high initial

271 titer and direct surface contact, we observed a maximum of a 0.6 log<sub>10</sub> reduction for the  
272 10-cent coin, while lower reduction factors were observed for the other surfaces (Fig.  
273 4A). In case of drying the initial inoculum followed by a fingerprint, we observed a 2.1  
274 log<sub>10</sub> reduction on a 10 € banknote, while lower reduction factors were observed for the  
275 other surfaces. For a low initial titer and direct surface contact, we observed the highest  
276 reduction on the stainless-steel carrier (1.2 log<sub>10</sub> reduction). In case of drying the initial  
277 inoculum followed by a fingerprint, we observed a 0.8 log<sub>10</sub> reduction on a 10-cent coin.  
278 Importantly, no infectious virus could be recovered from the 10 € banknote under these  
279 conditions.

280

### 281 **Transferability of SARS-CoV-2 from banknotes, coins and pvc to skin**

282 Next, we examined the transmission of infectious SARS-CoV-2 from surfaces to  
283 fingertips. Surfaces were inoculated with either a high ( $\sim 1 \times 10^6$  TCID<sub>50</sub>/mL) or low ( $\sim$   
284  $1 \times 10^4$  TCID<sub>50</sub>/mL) titer to represent different degrees of surface contamination. As  
285 described before, virus transfer was assessed directly following inoculation (wet) or after  
286 drying either by printing (print) or rubbing (rub). For a high initial titer and direct surface  
287 contact, we observed a maximum of a 1 log<sub>10</sub> reduction for the 10-cent coin, while lower  
288 reduction factors were observed for the other surfaces (Fig. 5A). Drying of the initial  
289 inoculum led to  $\sim 1$  log loss in virus titer. In the dried state, less virus was transferred  
290 and could be recovered, e.g. by fingerprint we observed a 3.0 log<sub>10</sub> reduction on the 10-  
291 cent coin, while lower reduction factors were observed for the other surfaces. For a low  
292 initial titer and direct surface contact, we observed the highest reduction on the 10 €  
293 banknote (0.7 log<sub>10</sub> reduction). In case of drying the initial inoculum followed by a  
294 fingerprint we observed a reduction of the initial inoculum close/under the limit of

295 detection and only from the PVC very low ( $2.19 \times 10^1$  TCID<sub>50</sub>/mL) amounts of infectious  
296 virus could be recovered (Fig. 5B).  
297

298 **4. Discussion**

299 Human-to-human transmission of SARS-CoV-2 occurs primarily by respiratory aerosols  
300 or droplets and subsequent contact to nasal, oral, or ocular mucosal membranes.  
301 Evidence-to-date further suggests that fomite transmission is possible for SARS-CoV-2  
302 [5,19], however, the importance of this route in healthcare and public settings remains  
303 controversial [12,13,20]. Fomite-based transmission contributes to the spread of other  
304 common respiratory pathogens [21,22]. Consequently, paper currency and coins have  
305 been suspected as a potential transmission vehicle for various pathogens, including  
306 SARS-CoV-2 [10,11,23]. Although infectious viruses have not been directly detected on  
307 banknotes or coins, the potential for their transmission has been highlighted by the  
308 observation that human influenza viruses were able to persist and remain infectious for  
309 several days when they were deposited on banknotes [24]. Furthermore, many other  
310 viruses, (i.e. Adenoviruses, Rotaviruses) are stable in the environment and exhibit high  
311 infectivity and, thus, could possibly be transferred by banknotes and coins [25]. In  
312 agreement with previous reports we found that high titers of SARS-CoV-2 and its  
313 surrogate BCoV, after an initial loss of infectivity, remained infectious for days under  
314 laboratory conditions on banknotes and coins (Table 1, Fig. 1 and 2) [19,26]. The initial  
315 loss of infectivity was higher on coins and banknotes, irrespective of protective varnish,  
316 when compared to stainless steel, indicating faster desiccation due to liquid absorption  
317 (banknotes) or antiviral surface properties (e.g. copper in coins). Both BCoV and SARS-  
318 CoV-2 displayed highly comparable levels of virus transfer and stability among the  
319 different conditions (Fig. 6), implying that BCoV is also a suitable surrogate virus to  
320 model surface transmission of SARS-CoV-2.

321



322 Decay of SARS-CoV2 is likely determined by a combination of the initial amount of  
323 infectious virus deposited on a given surface and other environmental parameters  
324 (temperature, humidity, light and UV conditions). Furthermore, persistence of pathogens  
325 in the environment represents only the first requirement for self-inoculation via  
326 contaminated fingers. However, the possibility of fingerprint transmission has  
327 quantitatively been examined only in the context of bacteria [27]. Using a newly  
328 developed virus touch transfer assay, we observed transfer of BCoV and SARS-CoV-2  
329 between fomites and skin using a high initial virus titer ( $\sim 10^6$  infectious virus particles).  
330 This transfer was more efficient for the wet inoculum, while visual desiccation on the  
331 one hand resulted in reduction of the titer as outlined above, as well as less efficient  
332 mobilization of the viral particles, reflected by higher reduction factors. Consequently,  
333 lower viral burdens ( $\sim 10^4$  infectious virus particles) mimicking real life contamination  
334 events more realistic, as observed for influenza viruses in aerosol particles from human  
335 coughs [13,28], were not effectively transferred (Fig. 4 and 5). Recent studies estimated  
336 a minimal infectious dose of SARS-CoV-2 in the range of  $3 \times 10^2$  to  $2 \times 10^3$  viral  
337 particles [29]. Overall, our results point to a low risk of SARS-CoV-2 transmission by  
338 coins and banknotes and the rush to abandon cash during the pandemic seems  
339 unnecessary.

340 Given that cash is typically stored securely in wallets and purses, the risk of direct  
341 contamination through exhaled droplets and aerosols seems much lower than constantly  
342 exposed surfaces (e.g. doorbell, shopping carts). The role of a contagious person  
343 contaminating banknotes and coins afresh when handing over, needs to be addressed in  
344 future studies. Current government regulations to wear masks minimize the spread of  
345 exhaled droplets and aerosols, and in combination with good hand hygiene also mitigate

346 the risk of transmission via contaminated surfaces. Still, contamination of cash is most  
347 likely to occur indirectly by transfer from the hands of an infected person or finger  
348 contact with a contaminated surface. However, any contamination by these routes would  
349 likely result in a much lower degree of surface contamination than by direct  
350 contamination as investigated in this study. Consequently, the overall chance of  
351 transmission of SARS-CoV-2 through banknotes, coins and credit/debit cards seems low  
352 since a timely order of specific events – sufficient viable virus deposited on a surface,  
353 survival of the virus until the surface is touched, and transfer of an infectious dose of  
354 virus – is required.

355

356 **Disclosure statement**

357 DT and ES receive consulting fees from the European Central Bank. FHB is executive  
358 partner of Dr. Brill + Partner GmbH. DP and BB are employees at Dr. Brill + Partner  
359 GmbH. BT and JH are employees at the European Central Bank. MW is employee at  
360 De Nederlandsche Bank.

361

362 **Funding**

363 This study was in parts financed by the European Central Bank.

364

365 **Acknowledgments.**

366 We thank Victor M Corman and Terry C Jones from Charité Universitätsmedizin Berlin,  
367 Germany for sequencing of the SARS-CoV-2 strain used in this study. Moreover, we  
368 would like to thank all members of the Department of Molecular & Medical Virology at  
369 the Ruhr University Bochum for support and fruitful discussion.

370

371 **References**

- 372 1. Nicholas G. Davies; Sam Abbott; Rosanna C. Barnard; Christopher I. Jarvis;  
373 Adam J. Kucharski; James D. Munday; Carl A. B. Pearson; Timothy W. Russell;  
374 Damien C. Tully; Alex D. Washburne; et al. Estimated transmissibility and impact  
375 of SARS-CoV-2 lineage B.1.1.7 in England. *Science* **2021**,  
376 doi:10.1126/science.abg3055.
- 377 2. Hou, Y.J.; Chiba, S.; Halfmann, P.; Ehre, C.; Kuroda, M.; Dinnon, K.H.; Leist,  
378 S.R.; Schäfer, A.; Nakajima, N.; Takahashi, K.; et al. SARS-CoV-2 D614G  
379 variant exhibits efficient replication ex vivo and transmission in vivo. *Science*  
380 **2020**, *370*, 1464–1468, doi:10.1126/science.abe8499.
- 381 3. Kampf, G.; Brüggemann, Y.; Kaba, H.E.J.; Steinmann, J.; Pfaender, S.;  
382 Scheithauer, S.; Steinmann, E. Potential sources, modes of transmission and  
383 effectiveness of prevention measures against SARS-CoV-2. *J. Hosp. Infect.* **2020**,  
384 *106*, 678–697, doi:10.1016/j.jhin.2020.09.022.
- 385 4. Kratzel, A.; Steiner, S.; Todt, D.; V'kovski, P.; Brueggemann, Y.; Steinmann, J.;  
386 Steinmann, E.; Thiel, V.; Pfaender, S. Temperature-dependent surface stability of  
387 SARS-CoV-2. *J. Infect.* **2020**, *81*, 452–482, doi:10.1016/j.jinf.2020.05.074.
- 388 5. van Doremalen, N.; Bushmaker, T.; Morris, D.H.; Holbrook, M.G.; Gamble, A.;  
389 Williamson, B.N.; Tamin, A.; Harcourt, J.L.; Thornburg, N.J.; Gerber, S.I.; et al.  
390 Aerosol and Surface Stability of SARS-CoV-2 as Compared with SARS-CoV-1.  
391 *N. Engl. J. Med.* **2020**, *382*, 1564–1567, doi:10.1056/NEJMc2004973.
- 392 6. Ong, S.W.X.; Tan, Y.K.; Chia, P.Y.; Lee, T.H.; Ng, O.T.; Wong, M.S.Y.;  
393 Marimuthu, K. Air, Surface Environmental, and Personal Protective Equipment  
394 Contamination by Severe Acute Respiratory Syndrome Coronavirus 2 (SARS-  
395 CoV-2) From a Symptomatic Patient. *JAMA* **2020**, *323*, 1610–1612,  
396 doi:10.1001/jama.2020.3227.
- 397 7. Riddell, S.; Goldie, S.; Hill, A.; Eagles, D.; Drew, T.W. The effect of temperature  
398 on persistence of SARS-CoV-2 on common surfaces. *Viol. J.* **2020**, *17*, 145,  
399 doi:10.1186/s12985-020-01418-7.
- 400 8. Chia, P.Y.; Coleman, K.K.; Tan, Y.K.; Ong, S.W.X.; Gum, M.; Lau, S.K.; Lim,  
401 X.F.; Lim, A.S.; Sutjipto, S.; Lee, P.H.; et al. Detection of air and surface  
402 contamination by SARS-CoV-2 in hospital rooms of infected patients. *Nat.*  
403 *Commun.* **2020**, *11*, 2800, doi:10.1038/s41467-020-16670-2.
- 404 9. European Central Bank. Study on the payment attitudes of consumers in the euro  
405 area (SPACE) **2021**, doi:10.2866/849151.
- 406 10. Angelakis, E.; Azhar, E.I.; Bibi, F.; Yasir, M.; Al-Ghamdi, A.K.; Ashshi, A.M.;  
407 Elshemi, A.G.; Raoult, D. Paper money and coins as potential vectors of  
408 transmissible disease. *Future Microbiol.* **2014**, *9*, 249–261,  
409 doi:10.2217/FMB.13.161.
- 410 11. Pal, R.; Bhadada, S.K. Cash, currency and COVID-19. *Postgrad. Med. J.* **2020**,  
411 *96*, 427–428, doi:10.1136/postgradmedj-2020-138006.
- 412 12. Mondelli, M.U.; Colaneri, M.; Seminari, E.M.; Baldanti, F.; Bruno, R. Low risk of  
413 SARS-CoV-2 transmission by fomites in real-life conditions. *The Lancet*  
414 *Infectious Diseases* **2020**, doi:10.1016/S1473-3099(20)30678-2.
- 415 13. Goldman, E. Exaggerated risk of transmission of COVID-19 by fomites. *The*  
416 *Lancet Infectious Diseases* **2020**, *20*, 892–893, doi:10.1016/S1473-  
417 3099(20)30561-2.

- 418 14. Julian, T.R.; Leckie, J.O.; Boehm, A.B. Virus transfer between fingerpads and  
419 fomites. *J. Appl. Microbiol.* **2010**, *109*, 1868–1874, doi:10.1111/j.1365-  
420 2672.2010.04814.x.
- 421 15. Lopez, G.U.; Gerba, C.P.; Tamimi, A.H.; Kitajima, M.; Maxwell, S.L.; Rose, J.B.  
422 Transfer efficiency of bacteria and viruses from porous and nonporous fomites to  
423 fingers under different relative humidity conditions. *Appl. Environ. Microbiol.*  
424 **2013**, *79*, 5728–5734, doi:10.1128/AEM.01030-13.
- 425 16. Mahy, B.W.J.; Kangro, H.O. *Virology methods manual*; Academic Press: London,  
426 San Diego, 1996, ISBN 0124653308.
- 427 17. Siddharta, A.; Pfaender, S.; Vielle, N.J.; Dijkman, R.; Friesland, M.; Becker, B.;  
428 Yang, J.; Engelmann, M.; Todt, D.; Windisch, M.P.; et al. Virucidal Activity of  
429 World Health Organization-Recommended Formulations Against Enveloped  
430 Viruses, Including Zika, Ebola, and Emerging Coronaviruses. *J. Infect. Dis.* **2017**,  
431 *215*, 902–906, doi:10.1093/infdis/jix046.
- 432 18. European Central Bank. Modelling euro banknote quality in circulation **2017**,  
433 doi:10.2866/02309.
- 434 19. Chin, A.W.H.; Chu, J.T.S.; Perera, M.R.A.; Hui, K.P.Y.; Yen, H.-L.; Chan,  
435 M.C.W.; Peiris, M.; Poon, L.L.M. Stability of SARS-CoV-2 in different  
436 environmental conditions. *The Lancet Microbe* **2020**, *1*, e10, doi:10.1016/S2666-  
437 5247(20)30003-3.
- 438 20. Pitol, A.K.; Julian, T.R. Community Transmission of SARS-CoV-2 by Surfaces:  
439 Risks and Risk Reduction Strategies. *Environ. Sci. Technol. Lett.* **2021**,  
440 doi:10.1021/acs.estlett.0c00966.
- 441 21. Kraay, A.N.M.; Hayashi, M.A.L.; Hernandez-Ceron, N.; Spicknall, I.H.;  
442 Eisenberg, M.C.; Meza, R.; Eisenberg, J.N.S. Fomite-mediated transmission as a  
443 sufficient pathway: a comparative analysis across three viral pathogens. *BMC*  
444 *Infect. Dis.* **2018**, *18*, 540, doi:10.1186/s12879-018-3425-x.
- 445 22. Boone, S.A.; Gerba, C.P. Significance of fomites in the spread of respiratory and  
446 enteric viral disease. *Appl. Environ. Microbiol.* **2007**, *73*, 1687–1696,  
447 doi:10.1128/AEM.02051-06.
- 448 23. Xiao, S.; Li, Y.; Wong, T.-W.; Hui, D.S.C. Role of fomites in SARS transmission  
449 during the largest hospital outbreak in Hong Kong. *PLoS One* **2017**, *12*, e0181558,  
450 doi:10.1371/journal.pone.0181558.
- 451 24. Thomas, Y.; Vogel, G.; Wunderli, W.; Suter, P.; Witschi, M.; Koch, D.; Tapparel,  
452 C.; Kaiser, L. Survival of influenza virus on banknotes. *Appl. Environ. Microbiol.*  
453 **2008**, *74*, 3002–3007, doi:10.1128/AEM.00076-08.
- 454 25. Wißmann, J.E.; Kirchhoff, L.; Brüggemann, Y.; Todt, D.; Steinmann, J.;  
455 Steinmann, E. Persistence of Pathogens on Inanimate Surfaces: A Narrative  
456 Review. *Microorganisms* **2021**, *9*, doi:10.3390/microorganisms9020343.
- 457 26. Harbourt, D.E.; Haddow, A.D.; Piper, A.E.; Bloomfield, H.; Kearney, B.J.;  
458 Fetterer, D.; Gibson, K.; Minogue, T. Modeling the stability of severe acute  
459 respiratory syndrome coronavirus 2 (SARS-CoV-2) on skin, currency, and  
460 clothing. *PLoS Negl. Trop. Dis.* **2020**, *14*, e0008831,  
461 doi:10.1371/journal.pntd.0008831.
- 462 27. Knobloch, J.K.-M.; Tofern, S.; Kunz, W.; Schütze, S.; Riecke, M.; Solbach, W.;  
463 Wuske, T. "Life-like" assessment of antimicrobial surfaces by a new touch  
464 transfer assay displays strong superiority of a copper alloy compared to silver

- 465 containing surfaces. *PLoS One* **2017**, *12*, e0187442,  
466 doi:10.1371/journal.pone.0187442.
- 467 28. Lindsley, W.G.; Blachere, F.M.; Thewlis, R.E.; Vishnu, A.; Davis, K.A.; Cao, G.;  
468 Palmer, J.E.; Clark, K.E.; Fisher, M.A.; Khakoo, R.; et al. Measurements of  
469 airborne influenza virus in aerosol particles from human coughs. *PLoS One* **2010**,  
470 *5*, doi:10.1371/journal.pone.0015100.
- 471 29. Popa, A.; Genger, J.-W.; Nicholson, M.D.; Penz, T.; Schmid, D.; Aberle, S.W.;  
472 Agerer, B.; Lercher, A.; Endler, L.; Colaço, H.; et al. Genomic epidemiology of  
473 superspreading events in Austria reveals mutational dynamics and transmission  
474 properties of SARS-CoV-2. *Sci. Transl. Med.* **2020**, *12*,  
475 doi:10.1126/scitranslmed.abe2555.  
476

477 **Figure legends**

478 **Figure 1: Stability of BCoV on banknotes and steel discs.** BCoV stock solution was  
479 applied on 2 cm × 2 cm pieces of 10 € or 50 € banknotes and recovered after the indicated  
480 times. Residual titer was assessed via limiting dilution assay. **A)** Infectious BCoV  
481 recovered, displayed as raw TCID<sub>50</sub>/mL (y-axes) over time (categorical x-axes). Dots  
482 indicate mean values of three independent experiments with standard deviation, lower  
483 limit of quantification is shown as dashed line. **B)** Recovered BCoV displayed as  
484 TCID<sub>50</sub>/mL (y-axes) over time (continuous x-axes). Dots represent individual biological  
485 experiments, purple lines and areas display the course of the Weibull distribution fitted  
486 data and 95% confidence interval, lower limit of quantification is shown as dashed line.  
487 Virus particles created with BioRender.com.

488

489 **Figure 2: Stability of SARS-CoV-2 on banknotes, coins and steel discs.** SARS-CoV-  
490 2 stock solution was applied on 2 cm × 2 cm pieces of 10 € banknotes, 1 €, 10 cent and  
491 1 cent coins and recovered after the indicated times. Residual titer was assessed via  
492 limiting dilution assay. Humidity and temperature during experiments was logged  
493 (32% - 43% RH, 22.4 °C – 23.2 °C) **A)** Infectious SARS-CoV-2 recovered, displayed as  
494 raw TCID<sub>50</sub>/mL (y-axes) over time (categorical x-axes). Dots indicate mean values of  
495 three independent experiments with standard deviation, lower limit of quantification is  
496 shown as dashed line. **B)** Recovered SARS-CoV-2 displayed as TCID<sub>50</sub>/mL (y-axes)  
497 over time (continuous x-axes). Dots represent individual biological experiments, green  
498 lines and areas display the course of the Weibull distribution fitted data and 95%  
499 confidence interval, lower limit of quantification is shown as dashed line. Virus particles  
500 created with BioRender.com.

501 **Figure 3: Touch transfer assay setup.** To study the transfer of infectious BCoV and  
502 SARS-CoV2 between finger pads and different fomites, 50  $\mu$ L virus suspensions are  
503 placed on different surfaces (pieces of 10 € banknotes, 10 cent coins, pieces of PVC to  
504 mimic the surface of credit cards and stainless-steel discs as reference) in 10  $\mu$ L spots.  
505 Afterwards, the wet inoculum or the dried suspension is touched by “printing” or  
506 “rubbing” using finger pads (BCoV) or an artificial skin fabric (SARS-CoV-2).  
507 Subsequently, infectious virus was recovered by rubbing the fingertip on the bottom of  
508 a petri dish filled with respective culture media or in case of the artificial skin directly  
509 transferred into a container. The resulting suspension is serially diluted to determine  
510 TCID<sub>50</sub>/mL values of the remaining infectious virus. Virus particles created with  
511 BioRender.com.

512  
513 **Figure 4: Transferability of BCoV from cash fomites to fingertips.** Bars depict titer  
514 of input virus suspension and recovered infectious virus from different cash fomites, i.e.  
515 10 cent coin, 10 € banknote, pvc and steel disc carrier in four different scenarios. **A)**  
516 High initial input titer ( $\sim 10^6$  TCID<sub>50</sub>/mL) wet, when directly touch after application and  
517 dry, when transferred after visual desiccation and **B)** low initial input titer ( $\sim 10^4$   
518 TCID<sub>50</sub>/mL), wet and dry. Each scenario was performed by three test persons using eight  
519 fingers each. Numbers above bars indicate reduction factor, lower limit of quantification  
520 is shown as dashed line.

521

522

523



524 **Figure 5: Transferability of SARS-CoV-2 from cash fomites to fingertips.** Bars  
525 depict titer of input virus suspension and recovered infectious virus from different cash  
526 fomites, i.e. 10 cent coin, 10 € banknote, pvc and steel disc carrier in four different  
527 scenarios; mean  $\pm$  SD. Humidity and temperature during experiments was logged  
528 (32% - 43% RH, 22.4 °C – 23.2 °C) **A)** High initial input titer ( $\sim 10^6$  TCID<sub>50</sub>/mL) wet,  
529 when directly touch after application and dry, when transferred after visual desiccation  
530 and **B)** low initial input titer ( $\sim 10^4$  TCID<sub>50</sub>/mL), wet and dry. Numbers above bars  
531 indicate reduction factor, lower limit of quantification is shown as dashed line. Virus  
532 particles created with BioRender.com.

533

534 **Figure 6: Suitability of BCoV as surrogate for SARS-CoV-2 in touch transfer**  
535 **studies.** Titers of recovered infectious virus were matched between BCoV and SARS-  
536 CoV-2 for each scenario and linear regression curves calculated for input, rub and print.  
537 Gray line and area represent the overall linear regression and 95% confidence interval  
538 of all matched data points, dashed line depicts perfect correlation.

539

540

# BCoV

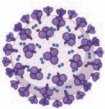

bank notes

control

10 euro

50 euro

steel disc

A)

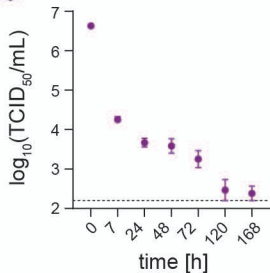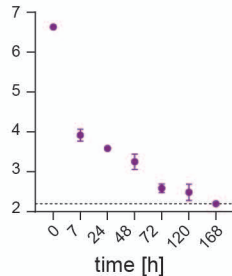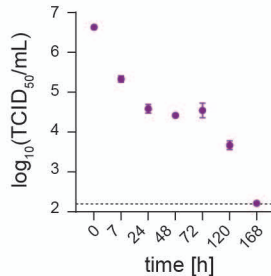

B)

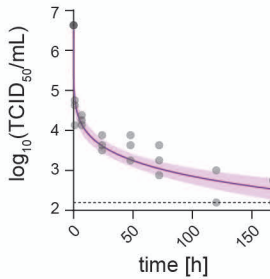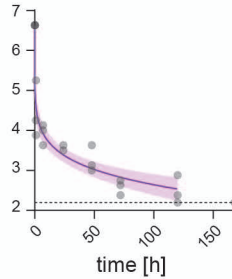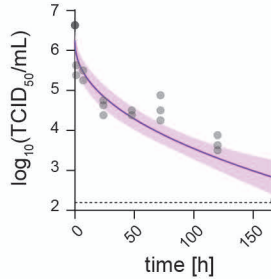

# SARS-CoV-2

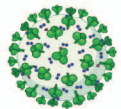

**A)**

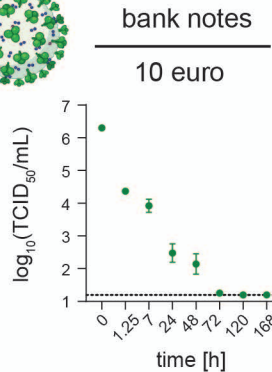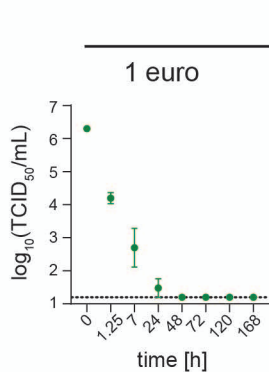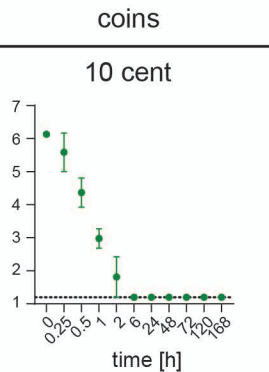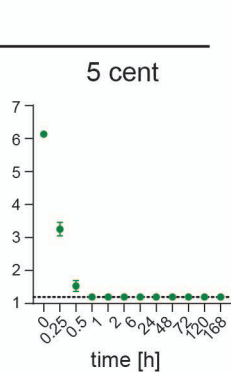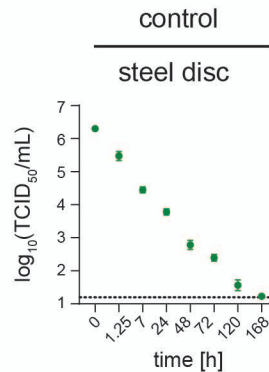

**B)**

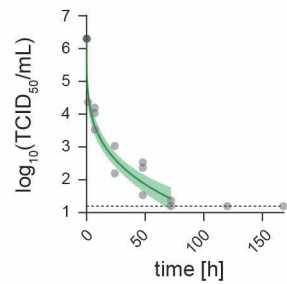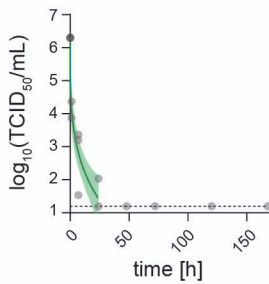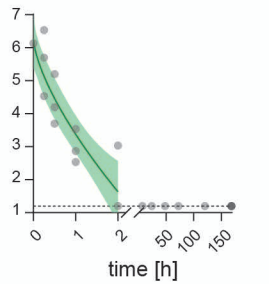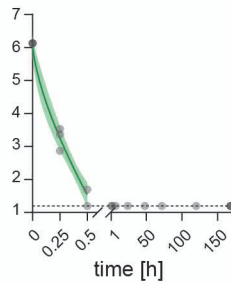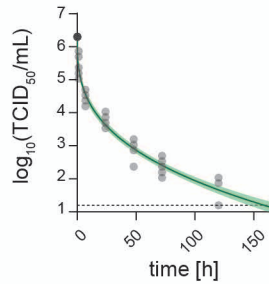

**BCoV**

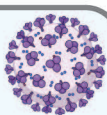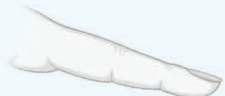

carrier

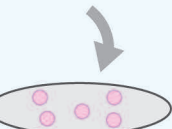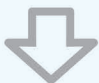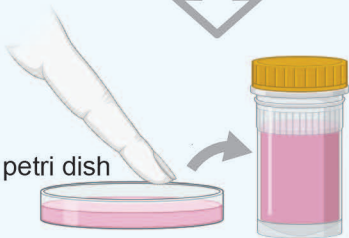

wipe off

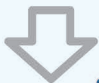

limiting dilution  
assay

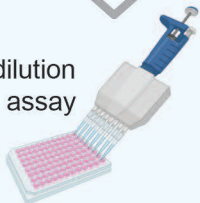

**SARS-CoV-2**

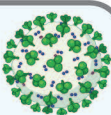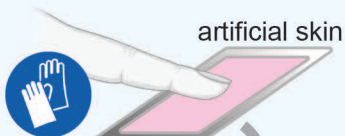

artificial skin

frame

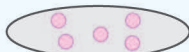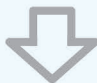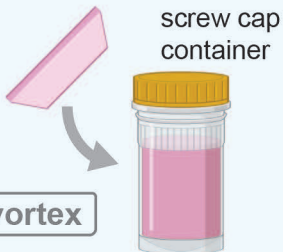

screw cap  
container

vortex

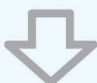

limiting dilution  
assay

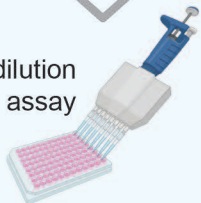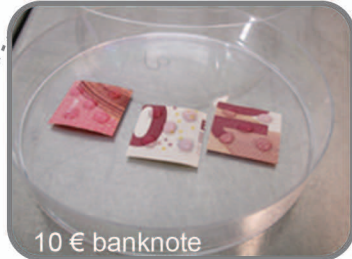

10 € banknote

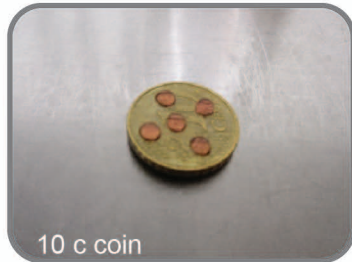

10 c coin

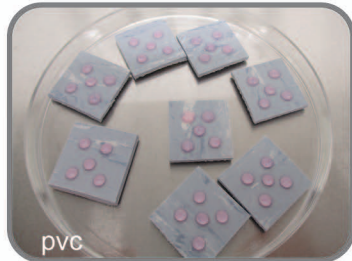

pvc

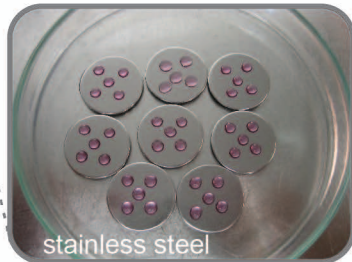

stainless steel

# BCoV

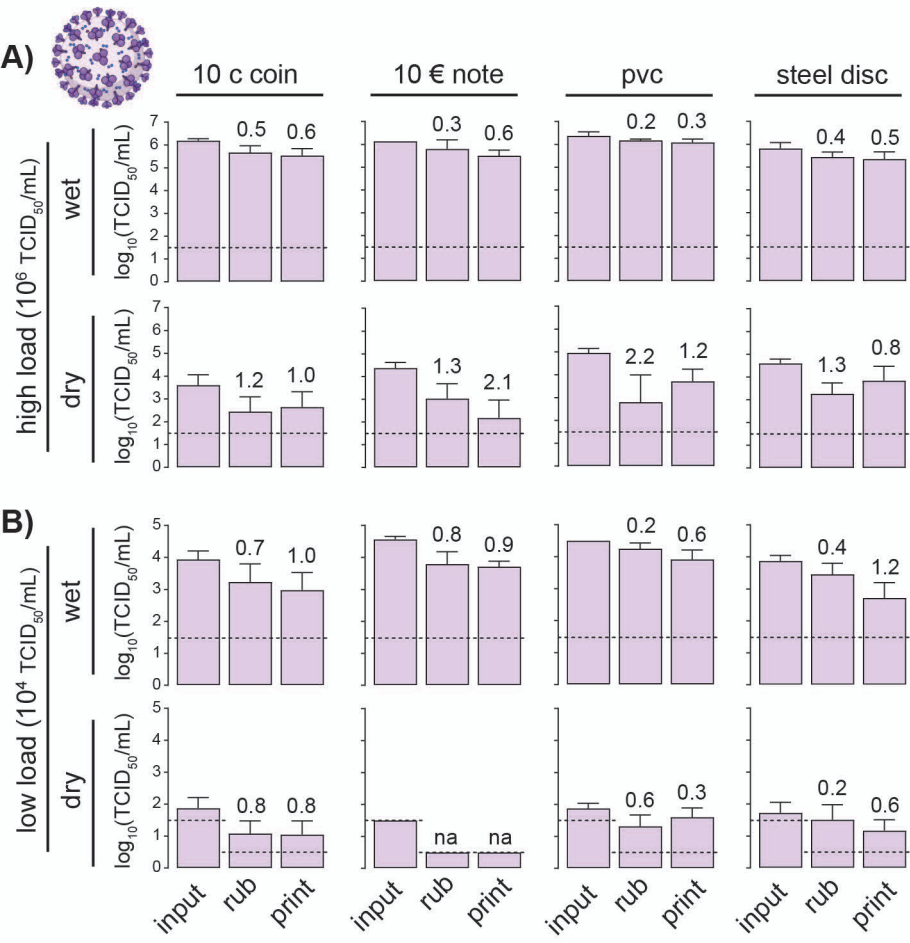

# SARS-CoV-2

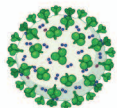

A)

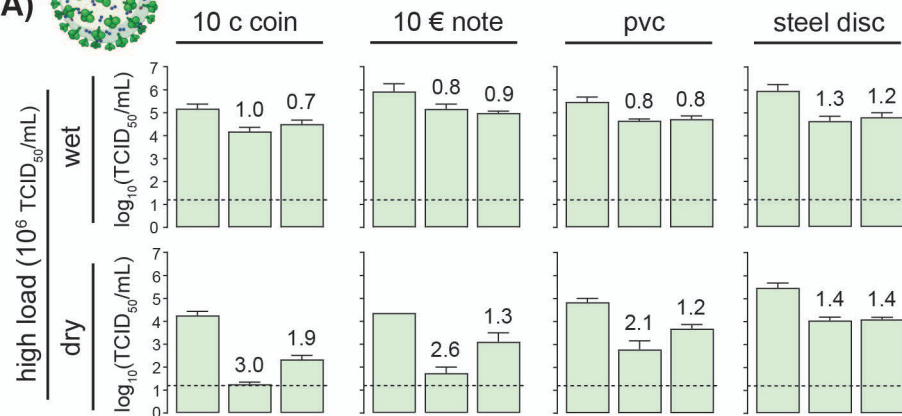

B)

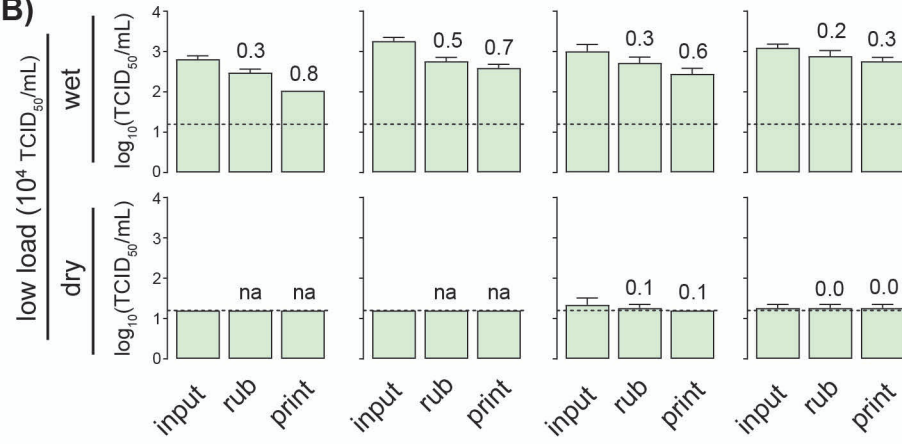

BCoV

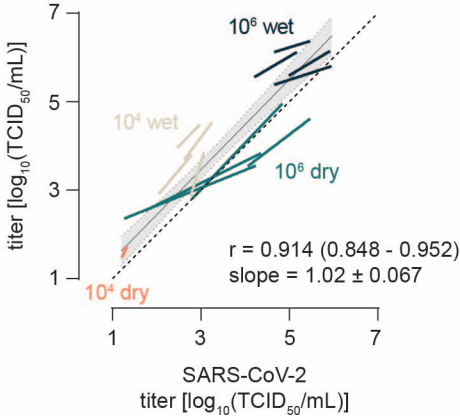

|                |                   | <b>SARS-CoV-2</b>        |                         | <b>BCoV</b>              |                         |
|----------------|-------------------|--------------------------|-------------------------|--------------------------|-------------------------|
|                | <b>material</b>   | <b>initial decay [h]</b> | <b>time to LLOQ [h]</b> | <b>initial decay [h]</b> | <b>time to LLOQ [h]</b> |
| <b>notes</b>   | <b>50 euro</b>    |                          |                         | 2.8                      | 175.6                   |
|                | <b>10 euro</b>    | 6.1                      | 85.7                    | 6.5                      | 216.3                   |
| <b>coins</b>   | <b>1 euro</b>     | 2.2                      | 28.4                    |                          |                         |
|                | <b>10 cent</b>    | 0.8                      | 2.3                     |                          |                         |
|                | <b>5 cent</b>     | 0.2                      | 0.6                     |                          |                         |
| <b>control</b> | <b>steel disc</b> | 20.6                     | 158.8                   | 53.5                     | 240.2                   |
